# Supplementary material for: Prediction of clinical depression scores and detection of changes in whole-brain using resting-state functional MRI data with partial least squares regression
Source: PubMed Central journal article supplement (PMC5507488; doi:10.1371/journal.pone.0179638), 2017-07-12
Supplement: pone.0179638.s003.pdf [file pone.0179638.s003.pdf]

## Supporting Information

**S2 Table. Root mean squared errors in input-age.**

|              | BDI-II    | SHAPS      | PANAS(n)   | age |
|--------------|-----------|------------|------------|-----|
| OLS          | 12.9±1.48 | 7.90±0.895 | 9.98±1.11  | -   |
| PLS          | 11.7±1.30 | 7.52±0.822 | 8.74±0.962 | -   |
| KPLS-Poly(2) | 11.7±1.30 | 7.70±0.842 | 8.83±0.963 | -   |
| KPLS-Poly(3) | 12.3±1.36 | 7.93±0.863 | 9.21±1.01  | -   |
| KPLS-Gauss   | 10.3±1.17 | 6.78±0.759 | 7.69±0.853 | -   |
