# Supplementary material for: Prediction of clinical depression scores and detection of changes in whole-brain using resting-state functional MRI data with partial least squares regression
Source: PubMed Central journal article supplement (PMC5507488; doi:10.1371/journal.pone.0179638), 2017-07-12
Supplement: pone.0179638.s004.pdf [file pone.0179638.s004.pdf]

## Supporting Information

**S3 Table. Root mean squared errors in no-age.**

|              | BDI-II    | SHAPS      | PANAS(n)   | age |
|--------------|-----------|------------|------------|-----|
| OLS          | 12.5±1.43 | 7.69±0.868 | 9.69±1.07  | -   |
| PLS          | 11.4±1.27 | 7.44±0.804 | 8.59±0.946 | -   |
| KPLS-Poly(2) | 11.0±1.22 | 7.17±0.777 | 8.24±0.916 | -   |
| KPLS-Poly(3) | 11.5±1.31 | 7.32±0.812 | 8.61±0.973 | -   |
| KPLS-Gauss   | 11.6±1.29 | 7.87±0.853 | 8.97±0.971 | -   |
