# Supplementary material for: Prediction of clinical depression scores and detection of changes in whole-brain using resting-state functional MRI data with partial least squares regression
Source: PubMed Central journal article supplement (PMC5507488; doi:10.1371/journal.pone.0179638), 2017-07-12
Supplement: pone.0179638.s006.pdf [file pone.0179638.s006.pdf]

## Supporting Information

**S5 Table. Classification Performance without subjects over 60.**

KPLS-Poly(2) followed by LDA significantly outperformed direct LDA and OLS followed by LDA in accuracy (adjusted for multiplicity using the Bonferroni-Holm method with significance level  $\alpha = 0.05$ ).

|                  | accuracy (%)     | sensitivity (%)  | specificity (%)  |
|------------------|------------------|------------------|------------------|
| direct LDA       | 66.1±4.27        | 66.7±6.19        | 65.6±5.89        |
| direct SVM       | 67.8±4.21        | 74.1±5.75        | 62.3±6.01        |
| OLS+LDA          | 61.7±4.38        | 61.1±6.40        | 62.3±6.01        |
| PLS+LDA          | 70.4±4.11        | 72.2±5.88        | 68.9±5.74        |
| KPLS-Poly(2)+LDA | <b>78.3±3.72</b> | <b>77.1±5.29</b> | <b>80.0±5.22</b> |
| KPLS-Poly(3)+LDA | 73.9±3.96        | 68.5±6.10        | 78.7±5.08        |
| KPLS-Gauss+LDA   | 70.4±4.11        | 68.5±6.10        | 72.1±5.56        |
