# Supplementary material for: Prediction of clinical depression scores and detection of changes in whole-brain using resting-state functional MRI data with partial least squares regression
Source: PubMed Central journal article supplement (PMC5507488; doi:10.1371/journal.pone.0179638), 2017-07-12
Supplement: pone.0179638.s007.pdf [file pone.0179638.s007.pdf]

## Supporting Information

**S6 Table. Root mean squared errors in extended AAL.** Performance with the standard AAL outperformed extended AAL significantly. (adjusted for multiplicity using the Bonferroni-Holm method with significance level  $\alpha = 0.05$ ).

|              | BDI-II    | SHAPS      | PANAS(n)   | age       |
|--------------|-----------|------------|------------|-----------|
| OLS          | 14.0±1.54 | 9.20±1.00  | 10.2±1.09  | 11.5±1.33 |
| PLS          | 11.9±1.30 | 7.52±0.832 | 8.64±0.936 | 10.4±1.16 |
| KPLS-Poly(2) | 12.5±1.34 | 7.90±0.859 | 9.58±1.02  | 10.8±1.20 |
| KPLS-Poly(3) | 11.3±1.23 | 7.25±0.797 | 8.64±0.927 | 10.7±1.17 |
| KPLS-Gauss   | 11.3±1.26 | 7.28±0.815 | 8.28±0.906 | 10.0±1.12 |
